# Supplementary material for: Compliant flooring to prevent fall-related injuries: a scoping review protocol
Source: PubMed Central journal article supplement — BMJ Open. 2016 Aug 15;6(8):e011757. doi: 10.1136/bmjopen-2016-011757 (PMC5013369; doi:10.1136/bmjopen-2016-011757), 2016-08-15
Supplement: bmjopen-2016-011757supp.pdf [file bmjopen-2016-011757supp.pdf]

## Supplementary File 1. Preliminary Ovid MEDLINE Search

| Syntax Line | Search Term                  |
|-------------|------------------------------|
| 1           | floor*.mp                    |
| 2           | carpet*.mp                   |
| 3           | ground surface*.mp           |
| 4           | smartcell*.mp                |
| 5           | tarkett omnisports excel.mp  |
| 6           | softile.mp                   |
| 7           | sorbashock.mp                |
| 8           | forbo.mp                     |
| 9           | kradal.mp                    |
| 10          | noraplan.mp                  |
| 11          | "Floors and Floorcoverings"/ |
| 12          | or/1-11                      |
| 13          | force*.mp                    |
| 14          | impact*.mp                   |
| 15          | trauma*.mp                   |
| 16          | biomechanic*.mp              |
| 17          | compress* strength*.mp       |
| 18          | strain*.mp                   |
| 19          | load*.mp                     |
| 20          | acceleration*.mp             |
| 21          | mechanical stress*.mp        |
| 22          | "Biomechanical Phenomena"/   |
| 23          | "Compressive Strength"/      |
| 24          | "Stress, Mechanical"/        |
| 25          | or/13-24                     |
| 26          | balanc*.mp                   |
| 27          | postur*.mp                   |
| 28          | stabilit*.mp                 |
| 29          | postural sway.mp             |
| 30          | bod* sway.mp                 |
| 31          | foot displacement*.mp        |
| 32          | foot deflection*.mp          |
| 33          | gait*.mp                     |
| 34          | walk*.mp                     |
| 35          | locomotion*.mp               |
| 36          | perturbation*.mp             |
| 37          | mobil*.mp                    |
| 38          | toe clearance*.mp            |
| 39          | centre of pressure*.mp       |
| 40          | center of pressure*.mp       |

| Syntax Line | Search Term                  |
|-------------|------------------------------|
| 41          | senior*.mp                   |
| 42          | elder*.mp                    |
| 43          | older adult*.mp              |
| 44          | older*.mp                    |
| 45          | geriatric*.mp                |
| 46          | old age*.mp                  |
| 47          | aging*.mp                    |
| 48          | gerontology.mp               |
| 49          | "Postural Balance"/          |
| 50          | "Posture"/                   |
| 51          | "Gait"/                      |
| 52          | "Locomotion"/                |
| 53          | exp "Aged"/                  |
| 54          | exp Geriatrics/              |
| 55          | or/26-54                     |
| 56          | injur*.mp                    |
| 57          | wound*.mp                    |
| 58          | trauma*.mp                   |
| 59          | bruise*.mp                   |
| 60          | bruising*.mp                 |
| 61          | contusion*.mp                |
| 62          | swell*.mp                    |
| 63          | hematoma*.mp                 |
| 64          | haematoma*.mp                |
| 65          | laceration*.mp               |
| 66          | abrasion*.mp                 |
| 67          | cut*.mp                      |
| 68          | sprain*.mp                   |
| 69          | strain*.mp                   |
| 70          | dislocation*.mp              |
| 71          | fractur*.mp                  |
| 72          | concussion*.mp               |
| 73          | intracranial haemorrhage*.mp |
| 74          | intracranial hemorrhage*.mp  |
| 75          | "Wounds and Injuries"/       |
| 76          | "Injury Severity Score"/     |
| 77          | "Contusions"/                |
| 78          | exp "Dislocations"/          |
| 79          | "Lacerations"/               |

| Syntax Line | Search Term                                                   |
|-------------|---------------------------------------------------------------|
| 80          | "Soft Tissue Injuries"/                                       |
| 81          | "Multiple Trauma"/                                            |
| 82          | exp "Fractures, Bone"/                                        |
| 83          | "Neck Injuries"/                                              |
| 84          | "Back Injuries"/                                              |
| 85          | exp "Arm Injuries"/                                           |
| 86          | exp "Hand Injuries"/                                          |
| 87          | exp "Hip Injuries"/                                           |
| 88          | exp "Leg Injuries"/                                           |
| 89          | exp "Trauma Severity Indices"/                                |
| 90          | exp "Wounds, Nonpenetrating"/                                 |
| 91          | exp "Brain Injuries"/                                         |
| 92          | "Sprains and Strains"/                                        |
| 93          | "Athletic Injuries"/                                          |
| 94          | or/56-93                                                      |
| 95          | cost*.mp                                                      |
| 96          | health resource*.mp                                           |
| 97          | resource allocation*.mp                                       |
| 98          | economic*.mp                                                  |
| 99          | expens*.mp                                                    |
| 100         | exp "Costs and Cost Analysis"/                                |
| 101         | "Health Resources"/                                           |
| 102         | "Economics"/                                                  |
| 103         | exp "Economics, Medical"/                                     |
| 104         | exp "Economics, Hospital"/                                    |
| 105         | exp "Resource Allocation"/                                    |
| 106         | or/95-105                                                     |
| 107         | 25 OR 55 OR 94 OR 106                                         |
| 108         | fall.mp OR falls.mp OR fell.mp OR faller*.mp<br>OR falling.mp |
| 109         | trip.mp OR trips.mp OR tripped.mp OR<br>tripping.mp           |
| 110         | slip.mp OR slips.mp OR slipped.mp OR<br>slipping.mp           |
| 111         | "Accidental Falls"/                                           |
| 112         | or/108-111                                                    |
| 113         | 107 AND 112                                                   |
| 114         | injur*.mp                                                     |
| 115         | wound*.mp                                                     |
| 116         | chronic pain.mp                                               |
| 117         | muscle pain.mp                                                |
| 118         | musculoskeletal pain.mp                                       |

| Syntax Line | Search Term                       |
|-------------|-----------------------------------|
| 119         | rotator cuff.mp                   |
| 120         | bursitis.mp                       |
| 121         | dislocation*.mp                   |
| 122         | shoulder impingement syndrome*.mp |
| 123         | overuse syndrome*.mp              |
| 124         | sprain*.mp                        |
| 125         | strain*.mp                        |
| 126         | human engineering.mp              |
| 127         | occupational exposure*.mp         |
| 128         | lifting.mp                        |
| 129         | push*.mp                          |
| 130         | pull*.mp                          |
| 131         | occupational accident*.mp         |
| 132         | ergonomic*.mp                     |
| 133         | manual handling.mp                |
| 134         | patient handling.mp               |
| 135         | biomechanical phenomena.mp        |
| 136         | occupational health.mp            |
| 137         | fatigue*.mp                       |
| 138         | "Wounds and Injuries"/            |
| 139         | "Musculoskeletal Pain"/           |
| 140         | exp "Tendon Injuries"/            |
| 141         | exp "Bursitis"/                   |
| 142         | exp "Sprains and Strains"/        |
| 143         | exp "Dislocations"/               |
| 144         | "Neck Pain"/                      |
| 145         | "Shoulder Pain"/                  |
| 146         | "Rotator Cuff"/                   |
| 147         | "Shoulder Impingement Syndrome"/  |
| 148         | exp "Arm Injuries"/               |
| 149         | exp "Hand Injuries"/              |
| 150         | "Back Pain"/                      |
| 151         | "Low Back Pain"/                  |
| 152         | "Back Injuries"/                  |
| 153         | "Soft Tissue Injuries"/           |
| 154         | "Human Engineering"/              |
| 155         | "Moving and Lifting Patients"/    |
| 156         | "Lifting"/                        |
| 157         | "Biomechanical Phenomena"/        |
| 158         | "Occupational Exposure"/          |
| 159         | "Occupational Health"/            |

| Syntax Line | Search Term                                |
|-------------|--------------------------------------------|
| 160         | "Occupational Injuries"/                   |
| 161         | "Fatigue"/                                 |
| 162         | "Muscle Fatigue"/                          |
| 163         | "Cumulative Trauma Disorder"/              |
| 164         | "Musculoskeletal Physiological Phenomena"/ |
| 165         | or/114-164                                 |
| 166         | health personnel.mp                        |
| 167         | physical therapist*.mp                     |
| 168         | physical therapist* assistant*.mp          |
| 169         | caregiver*.mp                              |
| 170         | medical staff*.mp                          |
| 171         | nurse*.mp                                  |
| 172         | nurs* staff*.mp                            |
| 173         | nurs* aide*.mp                             |
| 174         | community health worker*.mp                |
| 175         | "Health Personnel"/                        |
| 176         | Physical Therapists"/                      |
| 177         | "Physical Therapist Assistants"/           |
| 178         | "Caregivers"/                              |
| 179         | exp "Medical Staff"/                       |
| 180         | exp "Nurses"/                              |
| 181         | exp "Nursing Staff"/                       |
| 182         | "Nurses' Aides"/                           |
| 183         | "Community Health Workers"/                |
| 184         | or/166-183                                 |
| 185         | 165 AND 184                                |
| 186         | 113 OR 185                                 |
| 187         | 12 AND 186                                 |
| 188         | animals/ not humans/                       |
| 189         | 187 NOT 188                                |
